# Supplementary material
Source: PubMed Central journal article supplement (PMC4400539)

Supplementary material

Cucumber metal transport protein MTP8 confers the increased tolerance to Mn when expressed in yeast and *Arabidopsis thaliana*.

Magdalena Migocka\*<sup>1</sup>, Anna Papierniak<sup>1</sup>, Ewa Maciaszczyk-Dziubińska<sup>2</sup>, Piotr Poździk<sup>1</sup>, Ewelina Posyniak<sup>1</sup>, Arnold Garbiec<sup>3</sup>, Sophie Filleur<sup>4,5</sup>

## Table S1

The accession numbers and nomenclature of MTP proteins from monocots and dicots used for the construction of phylogenetic tree. The number and symbols of proteins from *P. trichocarpa*, *O. sativa* and *Sorghum bicolor* were maintained according to previous annotations (Gustin *et al.*, 2011; Migeon *et al.*, 2010; Montanini *et al.*, 2007). The nomenclature for MTPs from *V. vinifera*, *B. distychon* and *Z. mays* was assigned based on previously annotated *A. thaliana* MTPs.

Table S1

| <i>Arabidopsis thaliana</i> |           | <i>Populus trichocarpa</i>                           |                                                                                      | <i>Vitis vinifera</i>  |                                  | <i>Oryza sativa</i>  |                                      | <i>Brachypodium distachyon</i> |                                  | <i>Sorghum bicolor</i> |                            | <i>Zea mays</i>    |                                  |
|-----------------------------|-----------|------------------------------------------------------|--------------------------------------------------------------------------------------|------------------------|----------------------------------|----------------------|--------------------------------------|--------------------------------|----------------------------------|------------------------|----------------------------|--------------------|----------------------------------|
| Symbol                      | TAIR      | Symbol                                               | GeneBank ID                                                                          | Symbol                 | GeneBank ID                      | Symbol               | RGAP ID                              | Symbol                         | GeneBank ID                      | Symbol                 | Phytozome v.8.0 ID         | Symbol             | Gramene-MaizeGDB ID              |
| AtMTP1                      | At2g46800 | PtrMTP1                                              | POPTR_0014s10180.1                                                                   | VvMTP1                 | XP_002266346.1                   | OsMTP1               | LOC_Os05g03780.1                     | BdMTP1                         | XP_003569059.1                   | SbMTP1                 | Sb09g002460                | ZmMTP1<br>ZmMTP1.1 | ACL53182.1<br>ACR35635.1         |
| AtMTP2                      | At3g61940 | PtrMTP2                                              | POPTR_0002s18080.1                                                                   | N/A                    |                                  | N/A                  |                                      | N/A                            |                                  | N/A                    |                            | N/A                |                                  |
| AtMTP3                      | At3g58810 | PtrMTP3.1<br>PtrMTP3.2                               | POPTR_0001s45520.1<br>POPTR_0011s15370.1                                             | VvMTP3                 | XP_002278303.1                   | N/A                  |                                      | N/A                            |                                  | N/A                    |                            | N/A                |                                  |
| AtMTP4                      | At2g29410 | PtrMTP4.1<br>PtrMTP4.2                               | POPTR_0001s25270.1<br>POPTR_2033s00200.1                                             | VvMTP4                 | XM_002280347.2                   | N/A                  |                                      | N/A                            |                                  | N/A                    |                            | N/A                |                                  |
| AtMTP5                      | At3g12100 | PtrMTP5                                              | POPTR_0016s04430.1                                                                   | VvMTP5                 | XP_002279787.1                   | OsMTP5               | LOC_Os02g58580.1                     | BdMTP5                         | XP_003570736.1                   | SbMTP5                 | Sb04g038530                | N/A                |                                  |
| AtMTP6                      | At2g47830 | PtrMTP6                                              | POPTR_0002s20980.1                                                                   | VvMTP6                 | XP_002269478.2                   | OsMTP6               | LOC_Os03g22550.1                     | BdMTP6                         | XP_003557927.1                   | SbMTP6                 | Sb01g035530                | ZmMTP6             | ACF86507.1                       |
| AtMTP7                      | At1g51610 | PtrMTP7                                              | POPTR_0010s25780.1                                                                   | VvMTP7                 | XP_002262765.1                   | OsMTP7               | LOC_Os04g23180.1                     | BdMTP7                         | XP_003581101.1                   | SbMTP7                 | Sb06g007330                | N/A                | N/A                              |
| AtMTP8                      | At3g58060 | PtrMTP8.1<br>PtrMTP8.2<br>PtrMTP8.3<br>PtrMTP8.4     | POPTR_0003s21540.1<br>POPTR_0001s04740.1<br>POPTR_0001s04750.1<br>POPTR_0001s04730.1 | VvMTP8.1<br>VvMTP8.2   | XP_002275885.1<br>XP_002285662.1 | OsMTP8<br>OsMTP8.1   | LOC_Os02g53490.1<br>LOC_Os03g12530.1 | BdMTP8<br>BdMTP8.1             | XP_003570531.1<br>XP_003558420.1 | SbMTP8<br>SbMTP8.1     | Sb04g034705<br>Sb01g041820 | ZmMTP8<br>ZmMTP8.1 | NP_001141097.1<br>NP_001167840.1 |
| AtMTP9                      | At1g79520 | PtrMTP9                                              | POPTR_0008s08310.1                                                                   | VvMTP9                 | XP_003634572.1                   | OsMTP9               | LOC_Os01g03914.1                     | BdMTP9                         | XP_003565291.1                   | SbMTP9                 | Sb03g007250                | ZmMTP9             | ACN36717.1                       |
| AtMTP10                     | At1g16310 | PtrMTP10.1<br>PtrMTP10.2<br>PtrMTP10.3<br>PtrMTP10.4 | POPTR_0010s17950.1<br>POPTR_0010s17960.1<br>POPTR_0010s17980.1<br>POPTR_0010s18000.1 | VvMTP10                | XP_002263815.1                   | N/A                  |                                      | N/A                            |                                  | N/A                    |                            | N/A                |                                  |
| AtMTP11                     | At2g39450 | PtrMTP11.1<br>PtrMTP11.2                             | POPTR_0010s21810.1<br>POPTR_0008s04940.1                                             | VvMTP11.1<br>VvMTP11.2 | XP_002282508.1<br>XP_002282522.2 | OsMTP11<br>OsMTP11.1 | LOC_Os01g62070.1<br>LOC_Os05g38670.1 | BdMTP11<br>BdMTP11.1           | XP_003564566.1<br>XP_003568286.1 | SbMTP11                | Sb03g039220                | N/A                |                                  |
| AtMTP12                     | At2g04620 | PtrMTP12                                             | POPTR_0005s11240.1                                                                   | VvMTP12                | XP_002280912.1                   | OsMTP12              | LOC_Os08g32650.1                     | BdMTP12                        | XP_003572199.1                   | SbMTP12                | Sb07g020630                | ZmMTP12            | NP_001167737.1                   |

Figure S1

The conserved residues in TMDs II and V of Zn-CDF and Mn-CDF groups of cucumber MTP proteins. The alignment was performed using ClustalW. Zn-CDF group is represented by CsMTP1, CsMTP4, CsMTP5 and CsMTP12, whereas Mn-CDFs comprise CsMTP8, CsMTP9 and CsMTP11. Shading indicates identical (dark blue) or similar (light blue) amino acid residues. The green (ZnCDFs) or red (Mn-CDFs) boxes indicate the conserved sequences HxxxD and DxxxD in members of the Zn-CDF or Mn-CDF group, respectively (Montanini *et al.*, 2007).

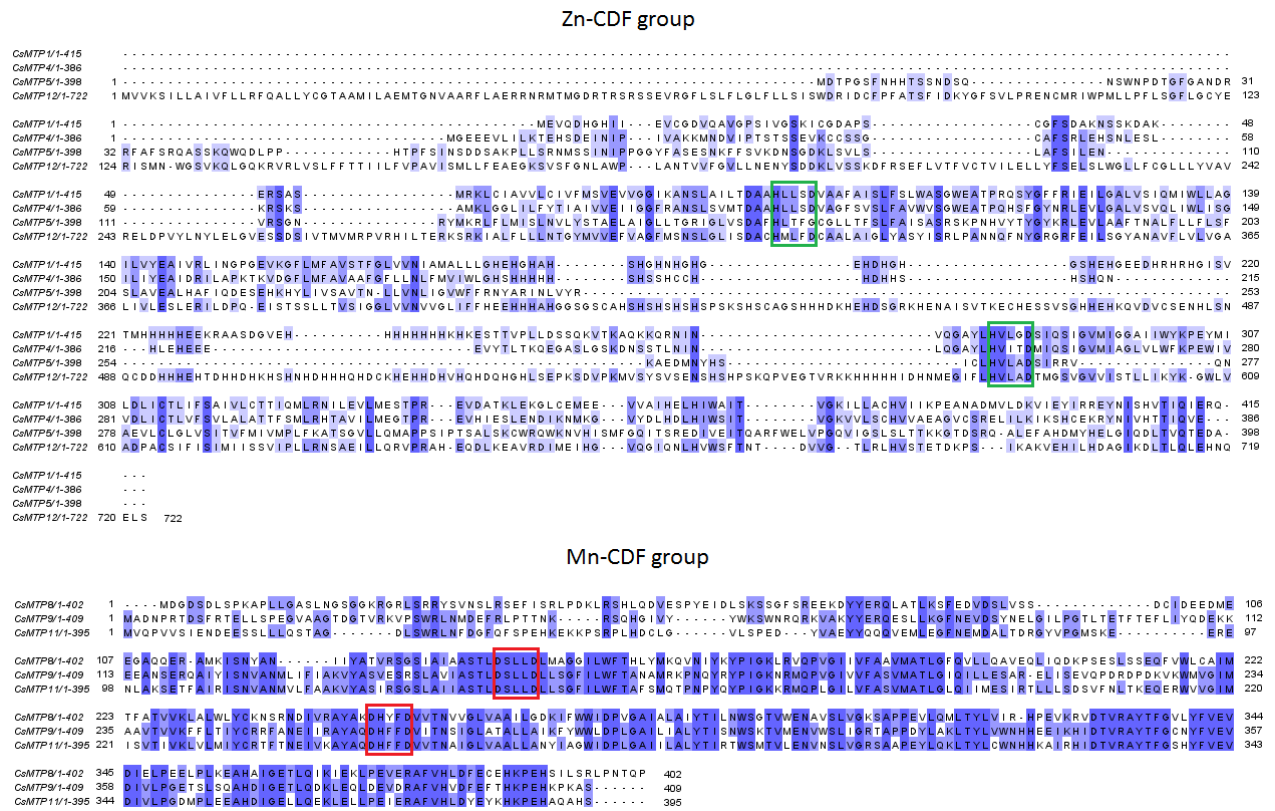

Figure S2

The characteristic motifs in cucumber MTP proteins. FGENESH algorithm was used to identify the full cDNA of *MTP* genes in the cucumber genome (Chinese long) and to translate the genes into amino acid sequences. Shading indicates the improved tentative signature sequence characteristic for all CDF proteins, according to Montanini et al. (2007), whereas the motifs characteristic for Zn-CDF, Mn-CDF or Zn/Fe-CDF subgroups of CDF family were marked in red.

**CsMTP1/ACHR01031515**

MEVQDHGHIIEVCGDVQAVGPSIVGSKICGDAPSCGFSDAKNSSKDAKERSASMRKLCIAVVL CIVFMSVEVVGGIKAN **SLA**  
**ILTDAAHLLSDVAFAISLFSLWASGW EATPRQSYGFFRIE**ILGALVSIQMIWLLAGILVYEIVRLINGPGEVKGFLMFAV  
STFGLV VNIAMALLLGHEHGHASHGHNHGHGEHDHGHSHEHGEEDHRHRHGISVTMHHHHHEEKRAASDGEHHHHHHHH  
KHKESTTVPLLDSSQVTKAQKQRNINVQGAYL **HVLGDS**IQSIGVMIGGAIIWYKPEYMILDLICTLIFS AIVLCTTIQML  
RNILEVLMESTPREVDATKLEKGLCEMEEVVAIHELHIWAITV GKILLACHV IIKPEANADMVLDKVIEYIRREYNISHVTI  
QIERQ

**CsMTP4/ACHR01049518**

MGEEEV LILKTEHSDEINIPIVAKKMNDVIPTSTSSEVKCCSSGCAFSRLEHSNLESLKRSKSAMKLGGLILFYTIAIIVEI  
IGGFRAN **LSVMTDAAHLLSDVAGFSVSLFAVWVSGW EATPQHSFGYNRLE**VLGALVSVQLIWLISGILIYE AIDRILAPKT  
KVDGFLMFAVAAFGFLNLNLFMVIWLGSHHHHHSHSSHCCHDHHSHSHQNHLEHEEEVYTLTKQEGASLGSKDNSSTLNI  
NLQGAYL **HVITD**MIQSIGVMIAGLV LWFKPEWIVVDLICTLVF SVLALATTF SMLRHTAVILMEGTPRE VHIESLENDIKNM  
KGVYDLHDLHIWSITVGKVVLSCHVVAEAGVCSRELILKIKSHCEKRYNIVHTTIQVE

**CsMTP5/ACHR01000847**

MDTPGSFNHHTSSNDSQNSWNPDTGFGANDRRFAFSRQASSKQWQDLPPHTPFSINSDDSAKPLLSRNMSSINIPPGGYFAS  
ESNKFFSVKDN SGDKLSVL **SLAFSILENVRSGNRYMKRFLMISLNLVYSTAELAIGLLTGRIGLV**SDAF **HLTFG**CGLLTFS  
LFAISASRSKPNHVYTYGYKRLEVLAAFTNALFLLFSLAVEALHAFIQDESEHKHYLIVSAVTNLLVNLIGWFFRNYA  
RINLVYRKAEDMNYHSICL **HVLADS**IRR VQNAEVLCLGLVSITVFMIVMPLFKATSGVLLQMAPP SIPTSALS KWCWRQWKNV  
HISMFGQITSREDIVEITQARFWE LVPGQVIGLSLTTKKGTD SRQALEFAHDMYHELGIQDLTVQTEDA

**CsMTP6/ACHR01000689**

MGYRFHRLNPILQSFYSRISPPHKEFH SIPSFQSPSLHPQFTFLGIYDDPKSKICRRWHLGSHRHHDDHFRGQEGENIFK  
LGLGADIGLAVGKAVTG YLSG **STAIADAAHSVSDVWLSGIALWSFKAGKAPKDK EHPYGHGKFE**TLGALGISSMLLATAGG  
IAWHASELLNLAIILSESQC FQGSRNLAWPSLFSCKQGLLSA APEIVNQPF GHESLHNHSHSHG EHHHGIDMDHPILALNM  
TIISICIKEGLYWITKRAGEKRG SGLMKANAW **HHRAD**AISSVVALIGVGG SILGVKFLDPLAGLVVSGMILKAGLQTGHQSI

LELVDAaipADQIDPFKQILQVEGVKCHRLRGRAGSSLYLDVHIEVDPFLSVSAAHSIGENVRHEIHTSHPEVSEVFIH  
IDPSISHFPKLSNQQAASAGTSNQSTDFPLTENIEATVSDIVQSKFPENMMVERITPHLLQGKILLQIEVSMPPDLLIRNA  
MDVAKRAEMEILKADSNIHVSIQLRLGQQIPQLSH

**CsMTP7/ACHR01005111**

MQISGPPSISPQKRFIIVLQVTRRLRPSSIECESVNRDKAKSSSCTIVLMRTSYLLQRFGFHHTHRSPQQQQQQQQQQHQ  
PECDSYRIPLIGTYFQSRRLSSPSSCSRRLVLLGLISLDSNPPRPLNHHYAFHRGFFTRAKPVQRIEFNDYHSQRAVTTAL  
WCNFLVFSLKFGVWFATS **SHVMLAEVHVSADFANQALLAYGLSSRRAPDAIHPYGYSKER** FVWSLISAVGIFCLGSGATI  
VNGIQNLWTSQPPANIHYAALVIGGSLIEGASLVVAIQAVKKGAAAEGMKLRDYVWRGHDPTSVAVMTEVDGAAVTGLIIA  
AASLVAVNTTGNAIYDPIGSIIVGNLLGMVAIFLIQRNRHALIGRAMDENDMQKVLQFLKNDPVVDALYDCKSEVIGPGFYR  
FKAEIDFNGVMVVQNYL TRTGREWAREFRQAASKDDSTLLKIMSNYGEEVVTALGSEVDRLKEIQELVPGIRHVDIEAH  
NPTGTP

**CsMTP8/ACHR0101125**

MDGSDLSPKAPLLGASLNGSGGKRRLSRRYSVNSLRSEFISRLPKLRSHLQDVESPYEIDLKSSGFSREEKDYYERQL  
ATLKSFEVDVSLVSSDCIDEEDMEEGAQQUERAMKISNYANIYATVRS **SIATAASTLDSLLDMAGGILWFTHLYMKQVNI**  
**YKYPIGKLRVQ** PVGIIIVFAAVMATLGFQVLLQAVEQLIQDKPSESLSSEQFVWLCAIMTFATVVKLALWLYCKNSRNDIVRA  
YAK **DHYFD** VVTNVVGLVAAILGDKIFWWIDPVGAIALAIYITLNSGTWENAVSLVGKSAPPEVLQMLTYLVIRHPEVKRV  
DTRAYTFGVLYFVEVDIELPEELPLKEAHAIGETLQIKIEKLPEVERAFVHLDFECEHKPEHSILSRLPNTQP

**CsMTP9/ACHR01003497**

MADNPRDTSFRTELLSPEGVAAGTDGTVRKVPSWRLNMDEFRLPTTNKRSQHGVIVYWKSWNRQRKVAKYERQESLLKGFN  
EVDSYNELGILPGTLTETTFELIYQDEKKEEANSERQAIYISNVANMLIFIKVYASVESR **SLAVIASTLDSLLDLSGFI**  
**LWFTANAMRKPNQYRYPIGKRMQ** PVGIVVFASVMATLGIQILLESARELISEVQPDPRDPKVKWVMGIMAAVTVVKFFLTI  
YCRRFANEIIRAYA **QDHF** VITNSIGLATALLAIKFYWLDPLGAILIALYITISNWSKTMENVWSLIGRTAPPDYLAKL  
YLVWNHHEEIKHIDTVRAYTFGCNYFVEVDIVLPGETSLSQAHDIGETLQDKLEQLDEVDRAFVHVDFEFTHKPEHKPKAS

**CsMTP11/ACHR01009952**

MVQPVVSIEENDEESSLLQSTAGDLSWRLNFDGFQFSPEHKEKPSRPLHDCLGVLSPEDYVAEYQQQVEMLEGFNEMDAL  
TDRGYVPGMSKEERENLAKSETFAIRISNVANMVLFAAKVYASIRSG **SLAIIASTLDSLLDLSGFIWFTAFSMQTPNPYQ**  
**YPIGKKRMQ** PLGILVFASVMATLGLQIIMESIRTL LLSDSVFNLTKERWVVGIMISVTIVKLVMIYCRFTTNEIVKAYA  
**QDHF** VVNAIGLVAALLANYIAGWIDPLGAILIALYITRTWSMTVLENVNSLVGRSAAPEYLQKLTLYLWVNHKAIKIRHID  
TVRAYTFGSHYFVEVDIVLPDMPLEEAHDIGELLQEKLELLPEIERAFVHLDYKHKPEHAQAHS

CsMTP12/ACHR01009785

MVVKSI LLAI VFL LR FQ ALL YCGTAAMILAEMTGNVAARFLAERRNRMTMGDRTRSRSSEVRGFLSLFLGLFLLSISWDRID  
CFPFATSFIDKYGFSVLPRENCMRIWPMLLPFLSGFLGCIYERISMNWGSVKQLGQKRVRLVSLFFTTIILFVPAVISMLLFE  
AEGKSVSFGNLAWPLANTVVFVGLLNENYSDDKLVSSKDFRSEFLVTFVCTVILELLYFSELSLWGLLFCGLLLYVAVRELD  
PVYLNYLELGVESSDSIVTMVMPVRHILTERKSRKIALFLLLNTGYMVVEFVAGFMSN **SLGLISDACHMLFDCAALAIGLY**  
**ASYISRLPANNQFN YGRGFE**ILSGYANAVFLVLV GALIVLES LERILDPQEISTSSLLTVSIGGLVNVWGLIFFHEEHHH  
AHGGSGSCAHS HSHSHSHSPSKSHSCAGSHHDKHEHDSGRKHENAI SVTKECHESVSGHHEHKQVDVCS ENHLSNQ CDDH  
HHEHTDHH DHKSHNH DHHHQHDCKHEHHDHVHQDQHGHLSEPKSDV PKMVSYSVSENSHSHPSKQPVEGTVRKKHHHHHI  
DHNMEGIFL **HVLAD**TMGSVGVVISTLLIKYKWL VADPACSFISIMI SSVIPLLRNSAEILLQRVPRAHEQDLKEAVRDI  
MEIHGVQGIQNLHVVSFTNTDVVGT LRLHVSTETDKPSIKAKVEHILHDAGIKDLTLQLEHNQELS

Figure S3

Nucleic acid sequences of the *CsMTP8* from cucumbers Krak (1227 bp) and Chinese long (1209 bp). The alignment was performed using Multalin version 5.4.1(Corpet, 1988). The identical nucleotides are marked in red, whereas the additional 18 bp long sequence (370-387 bp) specific only for Krak cultivar was marked in black.

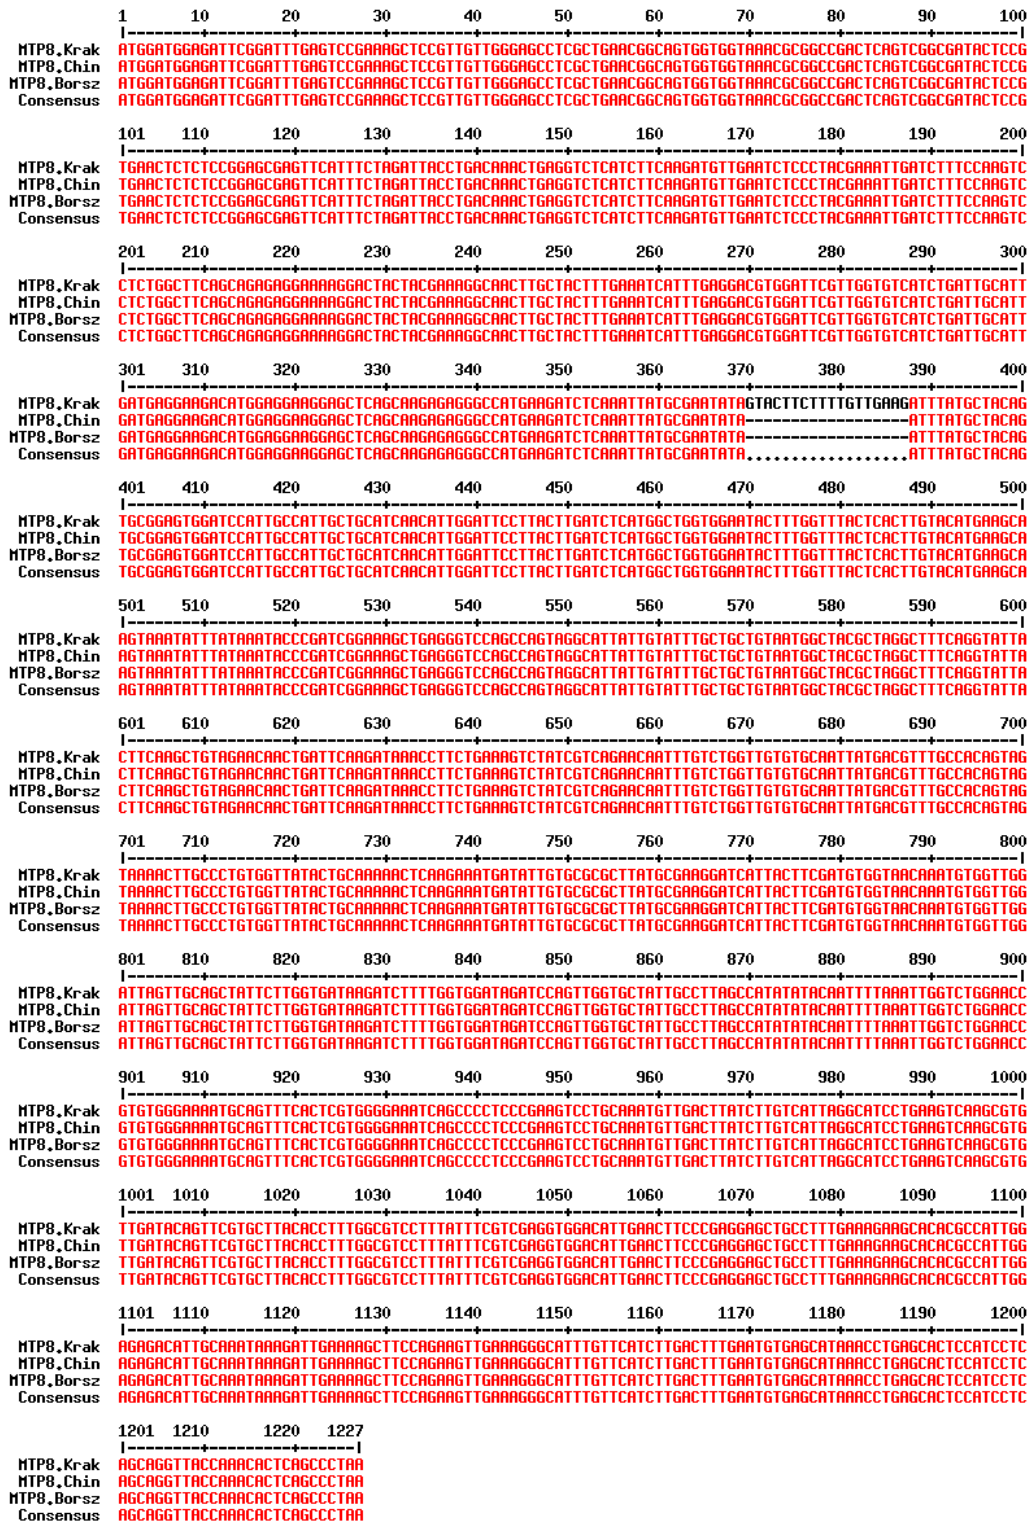

Supplement: supp_eru295_jexbot126250_file001.pdf [file supp_eru295_jexbot126250_file001.pdf]
